# Supplementary material
Source: PubMed Central journal article supplement (PMC5302552)
Supplement: NIHMS838167-supplement-Supplemental_Appendix.pdf [file NIHMS838167-supplement-Supplemental_Appendix.pdf]

**SUPPLEMENTAL MATERIAL**

**Supplemental Table 1: Biomarker assays**

| CATEGORY     | BIOMARKER          | ASSAY / METHOD                                                       |
|--------------|--------------------|----------------------------------------------------------------------|
| LIPIDS       | HDL-C              | Roche/Hitachi 704 direct enzymatic assay                             |
|              | HDL-p              | Nuclear magnetic resonance spectroscopy,<br>LipoScience <sup>1</sup> |
|              | Lp(a)              | ELISA <sup>2,3</sup>                                                 |
|              | LDL-C              | Calculated based on Friedwald equation                               |
|              | LDL-p              | Nuclear magnetic resonance spectroscopy,<br>LipoScience <sup>1</sup> |
|              | TG                 | Roche/Hitachi 704 enzymatic assay                                    |
|              | Total cholesterol  | Roche/Hitachi 704 enzymatic assay                                    |
|              | Cholesterol efflux | BODIPY-cholesterol cell-based assay <sup>4</sup>                     |
| ADIPOKINES   | Leptin             | RIA, Linco Research <sup>5</sup>                                     |
|              | Adiponectin        | ELISA, Millipore, Inc <sup>6</sup>                                   |
| INFLAMMATION | D-dimer            | Luminex immunoassay, Alere, Inc.                                     |
|              | hs-CRP             | Roche/Hitachi 912 immunotubometric assay <sup>7</sup>                |
|              | OPG                | ELISA, R&D Systems <sup>8</sup>                                      |
|              | LP-PLA2 mass       | ELISA, diaDexus, Inc. <sup>9</sup>                                   |
|              | LP-PLA2 activity   | Colorimetric activity method, GlaxoSmithKline, <sup>9</sup>          |
|              | IL-18              | ELISA <sup>10</sup>                                                  |
|              | MCP-1              | Immunoassay, Biosite Inc. <sup>11*</sup>                             |

|                                          |              |                                                                                 |
|------------------------------------------|--------------|---------------------------------------------------------------------------------|
|                                          |              |                                                                                 |
|                                          | sRAGE        | ELISA, Biosite, Inc. <sup>12*</sup>                                             |
|                                          | sTNFR        | Luminex immunoassay, Alere, Inc.                                                |
| ENDOTHELIAL<br>FUNCTION /<br>DYSFUNCTION | sESAM        | Immunoassay, Biosite Inc. <sup>13*</sup>                                        |
|                                          | SDMA         | LC-MS/MS <sup>14, 15</sup>                                                      |
|                                          | ADMA         | LC-MS/MS <sup>16</sup>                                                          |
|                                          | Homoarginine | LC-MS/MS <sup>16</sup>                                                          |
|                                          | sICAM        | Luminex platform immunoassay, Biosite, Inc. <sup>13*</sup>                      |
|                                          | sVCAM        | Luminex platform immunoassay, Biosite, Inc. <sup>13*</sup>                      |
| MYOCYTE INJURY /<br>STRESS               | NT-proBNP    | Elecsys proBNP immunoassay Roche Diagnostics <sup>17</sup>                      |
|                                          | hs-cTnT      | Elecsys-2010 Troponin T hs STAT Immunoassay,<br>Roche Diagnostics <sup>18</sup> |
|                                          | sST2         | Luminex Immunoassay, Alere, Inc. <sup>19</sup>                                  |
|                                          | GDF-15       | ELISA, Alere, Inc. <sup>20</sup>                                                |
| KIDNEY FUNCTION                          | Cystatin C   | Immunonephelometric assay, Dade Behring, Inc. <sup>21†</sup>                    |

\*Biosite is now Alere, Inc., San Diego, California

†Dade Behring is now Siemens Healthcare Diagnostics, Inc

Abbreviations: ELISA (enzyme-linked immunosorbent assay), LC-MS/MS (Liquid chromatography-tandem mass spectrometry), RIA (Radioimmunoassay)

### References

1. Jeyarajah EJ, Cromwell WC and Otvos JD. Lipoprotein particle analysis by nuclear magnetic resonance spectroscopy. *Clin Lab Med.* 2006;26:847-70.
2. Guerra R, Yu Z, Marcovina S, Peshock R, Cohen JC and Hobbs HH. Lipoprotein(a) and apolipoprotein(a) isoforms: no association with coronary artery calcification in the Dallas Heart Study. *Circulation.* 2005;111:1471-9.
3. Marcovina SM, Albers JJ, Gabel B, Koschinsky ML and Gaur VP. Effect of the number of apolipoprotein(a) kringle 4 domains on immunochemical measurements of lipoprotein(a). *Clinical chemistry.* 1995;41:246-55.
4. Rohatgi A, Khera A, Berry JD, Givens EG, Ayers CR, Wedin KE, Neeland IJ, Yuhanna IS, Rader DR, de Lemos JA and Shaul PW. HDL cholesterol efflux capacity and incident cardiovascular events. *The New England journal of medicine.* 2014;371:2383-93.
5. Abdullah SM, Khera A, Leonard D, Das SR, Canham RM, Kamath SA, Vega GL, Grundy SM, McGuire DK and de Lemos JA. Sex differences in the association between leptin and CRP: results from the Dallas Heart Study. *Atherosclerosis.* 2007;195:404-10.
6. Neeland IJ, Ayers CR, Rohatgi AK, Turer AT, Berry JD, Das SR, Vega GL, Khera A, McGuire DK, Grundy SM and de Lemos JA. Associations of visceral and abdominal subcutaneous adipose tissue with markers of cardiac and metabolic risk in obese adults. *Obesity (Silver Spring, Md).* 2013;21:E439-47.
7. Khera A, McGuire DK, Murphy SA, Stanek HG, Das SR, Vongpatanasin W, Wians FH, Jr., Grundy SM and de Lemos JA. Race and gender differences in C-reactive protein levels. *Journal of the American College of Cardiology.* 2005;46:464-9.

8. Abedin M, Omland T, Ueland T, Khera A, Aukrust P, Murphy SA, Jain T, Gruntmanis U, McGuire DK and de Lemos JA. Relation of osteoprotegerin to coronary calcium and aortic plaque (from the Dallas Heart Study). *The American journal of cardiology*. 2007;99:513-8.
9. Brilakis ES, Khera A, Saeed B, Banerjee S, McGuire DK, Murphy SA and de Lemos JA. Association of lipoprotein-associated phospholipase A2 mass and activity with coronary and aortic atherosclerosis: findings from the Dallas Heart Study. *Clinical chemistry*. 2008;54:1975-81.
10. Zirlik A, Abdullah SM, Gerdes N, MacFarlane L, Schonbeck U, Khera A, McGuire DK, Vega GL, Grundy S, Libby P and de Lemos JA. Interleukin-18, the metabolic syndrome, and subclinical atherosclerosis: results from the Dallas Heart Study. *Arteriosclerosis, thrombosis, and vascular biology*. 2007;27:2043-9.
11. de Lemos JA, Morrow DA, Sabatine MS, Murphy SA, Gibson CM, Antman EM, McCabe CH, Cannon CP and Braunwald E. Association between plasma levels of monocyte chemoattractant protein-1 and long-term clinical outcomes in patients with acute coronary syndromes. *Circulation*. 2003;107:690-5.
12. Lindsey JB, de Lemos JA, Cipollone F, Ayers CR, Rohatgi A, Morrow DA, Khera A and McGuire DK. Association between circulating soluble receptor for advanced glycation end products and atherosclerosis: observations from the Dallas Heart Study. *Diabetes care*. 2009;32:1218-20.
13. Rohatgi A, Owens AW, Khera A, Ayers CR, Banks K, Das SR, Berry JD, McGuire DK and de Lemos JA. Differential associations between soluble cellular adhesion molecules and atherosclerosis in the Dallas Heart Study: a distinct role for soluble endothelial cell-selective adhesion molecule. *Arteriosclerosis, thrombosis, and vascular biology*. 2009;29:1684-90.
14. Schwedhelm E, Maas R, Tan-Andresen J, Schulze F, Riederer U and Böger RH. High-throughput liquid chromatographic-tandem mass spectrometric determination of arginine and

dimethylated arginine derivatives in human and mouse plasma. *Journal of Chromatography B*. 2007;851:211-219.

15. Gore MO, Luneburg N, Schwedhelm E, Ayers CR, Anderssohn M, Khera A, Atzler D, de Lemos JA, Grant PJ, McGuire DK and Boger RH. Symmetrical dimethylarginine predicts mortality in the general population: observations from the Dallas heart study. *Arteriosclerosis, thrombosis, and vascular biology*. 2013;33:2682-8.

16. Atzler D, Gore MO, Ayers CR, Choe CU, Boger RH, de Lemos JA, McGuire DK and Schwedhelm E. Homoarginine and cardiovascular outcome in the population-based Dallas Heart Study. *Arteriosclerosis, thrombosis, and vascular biology*. 2014;34:2501-7.

17. Abdullah SM, Khera A, Das SR, Stanek HG, Canham RM, Chung AK, Morrow DA, Drazner MH, McGuire DK and de Lemos JA. Relation of coronary atherosclerosis determined by electron beam computed tomography and plasma levels of n-terminal pro-brain natriuretic peptide in a multiethnic population-based sample (the Dallas Heart Study). *The American journal of cardiology*. 2005;96:1284-9.

18. de Lemos JA, Drazner MH, Omland T, Ayers CR, Khera A, Rohatgi A, Hashim I, Berry JD, Das SR, Morrow DA and McGuire DK. Association of troponin T detected with a highly sensitive assay and cardiac structure and mortality risk in the general population. *Jama*. 2010;304:2503-12.

19. Chen LQ, de Lemos JA, Das SR, Ayers CR and Rohatgi A. Soluble ST2 is associated with all-cause and cardiovascular mortality in a population-based cohort: the Dallas Heart Study. *Clinical chemistry*. 2013;59:536-46.

20. Rohatgi A, Patel P, Das SR, Ayers CR, Khera A, Martinez-Rumayor A, Berry JD, McGuire DK and de Lemos JA. Association of growth differentiation factor-15 with coronary

atherosclerosis and mortality in a young, multiethnic population: observations from the Dallas Heart Study. *Clinical chemistry*. 2012;58:172-82.

21. Patel PC, Ayers CR, Murphy SA, Peshock R, Khera A, de Lemos JA, Balko JA, Gupta S, Mammen PP, Drazner MH and Markham DW. Association of cystatin C with left ventricular structure and function: the Dallas Heart Study. *Circ Heart Fail*. 2009;2:98-104.

**Supplemental Table 2:** Biomarkers after full multivariable adjustment in pre-menopausal women compared with age-matched men and post-menopausal women compared with age-matched men

| BIOMARKER                   | OVERALL<br>$\beta$ -COEFFICIENT<br>(P-VALUE) | PRE-MENOPAUSAL<br>WOMEN VS AGE-<br>MATCHED MEN<br>$\beta$ -COEFFICIENT<br>(P-VALUE) | POST-MENOPAUSAL<br>WOMEN VS AGE-<br>MATCHED MEN<br>$\beta$ -COEFFICIENT<br>(P-VALUE) |
|-----------------------------|----------------------------------------------|-------------------------------------------------------------------------------------|--------------------------------------------------------------------------------------|
| <b>LIPIDS</b>               |                                              |                                                                                     |                                                                                      |
| HDL-C, mg/dL                | 0.06<br>(p=0.02)                             | 0.02<br>(p=0.67)                                                                    | 0.12<br>(p=0.007)                                                                    |
| HDL-p, $\mu$ mol/L          | 0.05<br>(p=0.008)                            | 0.008<br>(p=0.78)                                                                   | 0.18<br>(p=0.0004)                                                                   |
| Lp(a), nmol/L               | 0.002<br>(p=0.98)                            | -0.04<br>(p=0.81)                                                                   | -0.17<br>(p=0.47)                                                                    |
| LDL-C, mg/dL                | -0.09<br>(p=0.01)                            | -0.20<br>(p=0.0003)                                                                 | 0.07<br>(p=0.29)                                                                     |
| LDL-p, $\mu$ mol/L          | -0.03<br>(p=0.39)                            | -0.08<br>(p=0.05)                                                                   | 0.07<br>(p=0.27)                                                                     |
| TG, mg/dL                   | 0.03<br>(p=0.61)                             | 0.04<br>(p=0.63)                                                                    | 0.13<br>(p=0.17)                                                                     |
| Total cholesterol,<br>mg/dL | -0.03<br>(p=0.16)                            | -0.09<br>(p=0.0009)                                                                 | 0.08<br>(p=0.03)                                                                     |

|                                 |                    |                     |                    |
|---------------------------------|--------------------|---------------------|--------------------|
| Cholesterol efflux,<br>units    | -0.02<br>(p=0.53)  | -0.04<br>(p=0.37)   | 0.07<br>(p=0.24)   |
| <b>ADIPOKINES</b>               |                    |                     |                    |
| Leptin, ng/mL                   | 0.84<br>(p<.0001)  | 0.86<br>(p=0.0003)  | 0.79<br>(p=0.0004) |
| Adiponectin, µg/mL              | -0.10<br>(p=0.04)  | -0.08<br>(p=0.27)   | -0.13<br>(p=0.18)  |
| <b>INFLAMMATION</b>             |                    |                     |                    |
| D-dimer, µg/mL                  | 0.42<br>(p<.0001)  | 0.60<br>(p=0.0003)  | 0.06<br>(p=0.69)   |
| hs-CRP, mg/dL                   | -0.05<br>(p=0.64)  | -0.17<br>(p=0.26)   | 0.22<br>(p=0.27)   |
| OPG, pg/mL                      | 0.09<br>(p=0.13)   | 0.07<br>(p=0.44)    | 0.09<br>(p=0.37)   |
| LP-PLA2 mass, µg/L              | -0.15<br>(p<.0001) | -0.14<br>(p=0.0003) | -0.15<br>(p=0.006) |
| LP-PLA2 activity,<br>µmol/min/L | -0.11<br>(p<.0001) | -0.10<br>(p=0.004)  | -0.12<br>(p=0.007) |
| IL-18, pg/mL                    | -0.15<br>(p=0.10)  | -0.15<br>(p=0.29)   | -0.03<br>(p=0.90)  |
| MCP-1, pg/mL                    | -0.11<br>(p=0.03)  | -0.18<br>(p=0.01)   | -0.09<br>(p=0.37)  |
| sRAGE, ng/mL                    | 0.02               | 0.01                | 0.03               |



|                                           |                    |                     |                     |
|-------------------------------------------|--------------------|---------------------|---------------------|
|                                           | (p=0.62)           | (p=0.81)            | (p=0.71)            |
| sTNFR, pg/mL                              | -0.13<br>(p=0.05)  | -0.03<br>(p=0.74)   | -0.22<br>(p=0.07)   |
| <b>ENDOTHELIAL FUNCTION / DYSFUNCTION</b> |                    |                     |                     |
| sESAM, ng/mL                              | -0.20<br>(p<.0001) | -0.18<br>(p=0.0005) | -0.27<br>(p=0.0004) |
| SDMA, $\mu$ mol/L                         | -0.05<br>(p<.0001) | -0.05<br>(p=0.0003) | -0.05<br>(p=0.0004) |
| ADMA, $\mu$ mol/L                         | -0.02<br>(p=0.001) | -0.04<br>(p=0.0003) | -0.005<br>(p=0.74)  |
| Homoarginine,<br>$\mu$ mol/L              | 0.12<br>(p=0.0008) | 0.09<br>(p=0.09)    | 0.17<br>(p=0.006)   |
| sICAM, ng/mL                              | 0.05<br>(p=0.41)   | 0.09<br>(p=0.20)    | -0.04<br>(p=0.73)   |
| sVCAM, ng/mL                              | -0.03<br>(p=0.60)  | -0.12<br>(p=0.11)   | 0.008<br>(p=0.95)   |
| <b>MYOCYTE INJURY / STRESS</b>            |                    |                     |                     |
| NT-proBNP, pg/mL                          | 0.51<br>(p<.0001)  | 0.65<br>(p=0.0003)  | 0.28<br>(p=0.18)    |
| hs-cTnT, % $\geq$ 3 ng/L                  | -0.32<br>(p<.0001) | -0.22<br>(p=0.005)  | -0.48<br>(p=0.0004) |
| sST2, $\mu$ g/L                           | -0.05<br>(p=0.44)  | 0.03<br>(p=0.73)    | -0.21<br>(p=0.04)   |

|                           |                    |                     |                     |
|---------------------------|--------------------|---------------------|---------------------|
| GDF-15, ng/L              | -0.04<br>(p=0.43)  | 0.04<br>(p=0.58)    | -0.23<br>(p=0.007)  |
| <b>KIDNEY DYSFUNCTION</b> |                    |                     |                     |
| Cystatin C, mg/L          | -0.17<br>(p<.0001) | -0.16<br>(p=0.0003) | -0.19<br>(p=0.0004) |

Legend:

+ $\beta$ -coefficient: higher in women

- $\beta$ -coefficient: lower in women

Significantly higher in women

Significantly lower in women

No significant difference between women and men

Variables adjusted for:

Model 1: age, race

Model 2: Model 1 + diabetes, hypertension, smoking, statin use, HOMA-IR, eGFR

Model 3: Model 2 + lean mass, fat mass, body surface area, visceral fat, subcutaneous fat, lower body fat

Model 4: Model 3 + left ventricular mass

Abbreviations: HDL-C, high density lipoprotein cholesterol; HDL-p, high density lipoprotein particle concentration; Lp(a), lipoprotein(a); LDL-C, low-density lipoprotein cholesterol; LDL-p, low-density lipoprotein particle concentration; TG, triglycerides; hs-CRP, high-sensitivity C-reactive protein; OPG, osteoprotegerin; LP-PLA2, lipoprotein phospholipase A2; IL-18,

interleukin-18; MCP-1, monocyte chemoattractant protein-1; sRAGE, soluble receptor for advanced glycation end products; sTNFR, soluble tumor necrosis factor receptor; sESAM, soluble endothelial cell selective adhesion molecule; SDMA, symmetrical dimethylarginine methylarginine; ADMA, asymmetrical dimethylarginine; sICAM, soluble intercellular adhesion molecule; sVCAM, soluble vascular cell adhesion molecule; NT-proBNP, N-terminal of the prohormone brain natriuretic peptide; hs-cTnT, high-sensitivity cardiac troponin T; sST2, soluble suppression of tumorigenicity 2; GDF-15, growth differentiation factor-15; HOMA-IR, homeostatic model assessment-insulin resistance; eGFR, estimated glomerular filtration rate

P-values adjusted for multiple testing using false discovery rate method

**Supplemental Figure 1: Definition of Menopausal Status in the Dallas Heart Study**

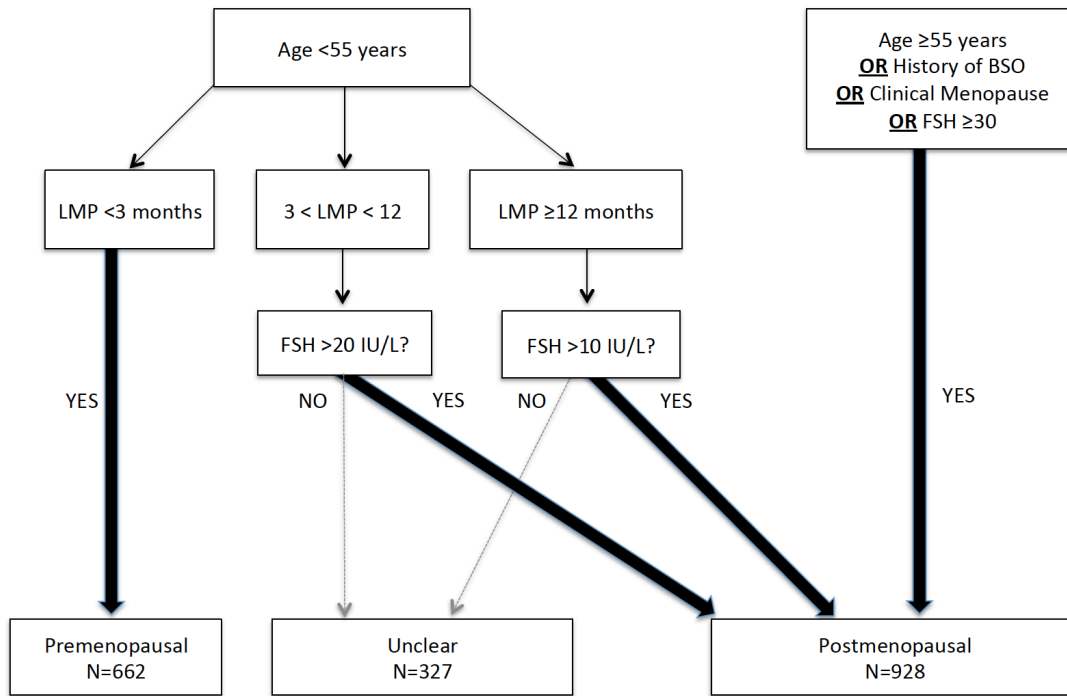

Legend: LMP, last menstrual period; BSO, bilateral salpingo-oophorectomy; FSH, follicle stimulating hormone  
FSH not measured were considered "no"
